# Supplementary material
Source: MDPI journal article supplement (https://www.mdpi.com/2071-1050/8/11/1097)
Supplement: s1 [file s1]

# Environmental Performance of Electricity Generation Based on Resources: A Life Cycle Assessment Case Study in Turkey

Zerrin Günkaya, Alp Özdemir, Aysun Özkan and Müfide Banar

**Table S1.** Data used to model coal-fired TPPs in SimaPro (with calculation details).

| Data Description                                             | TPPs                                                   |                        |                         |
|--------------------------------------------------------------|--------------------------------------------------------|------------------------|-------------------------|
|                                                              | Lignite                                                | Hard Coal              | Imported Coal           |
| Calorific value of lignite (kJ/kg)                           | 8360 <sup>1</sup>                                      | 12,958 <sup>2</sup>    | 25,707 <sup>3</sup>     |
| Total coal consumption in 2012 (ton)                         | 48,859,540 <sup>1</sup>                                | 1,254,623 <sup>1</sup> | 30,000,000 <sup>4</sup> |
| Lignite consumption (kg/kWh)                                 | 1.43                                                   | 0.63                   | 1.1                     |
| Coal burning system                                          | Pulverized coal burner (PCB) system                    |                        |                         |
| Cooling system <sup>5</sup>                                  | Sea water cooled                                       |                        |                         |
| Cooling water consumption (m <sup>3</sup> /kWh) <sup>5</sup> | 0.096                                                  | 0.16                   | 0.01                    |
| Process water treatment <sup>6</sup>                         | Chlorination-coagulation/flocculation demineralization |                        |                         |
| Wastewater generation (lt/kWh) <sup>7</sup>                  | 0.25                                                   | 0.42                   | 0.27                    |
| The wastewater emissions of the TPPs (mg/kWh) <sup>8</sup>   |                                                        |                        |                         |
| Chemical Oxygen Demand (COD) (mg/kWh)                        | 7.53                                                   | 12.7                   | 8.01                    |
| Suspended Solid Matter (SSM) (mg/kWh)                        | 25.1                                                   | 42.2                   | 26.9                    |
| Oil and Grease (mg/kWh)                                      | 2.51                                                   | 4.22                   | 2.69                    |
| Total Cyanide (mg/kWh)                                       | 0.13                                                   | 0.21                   | 0.14                    |
| Flue gas treatment unit                                      | Particle matter and DeSO <sub>x</sub> removal systems  |                        |                         |
| Stack gas emissions (kg/MWh) <sup>9</sup>                    |                                                        |                        |                         |
| SO <sub>2</sub>                                              | 41.07                                                  | 4.76                   | 4.76                    |
| NO <sub>x</sub>                                              | 3.41                                                   | 4.11                   | 4.11                    |
| Dust                                                         | 4.29                                                   | 3.75                   | 3.75                    |
| CO <sub>2</sub> <sup>10</sup>                                | 819                                                    | 767                    | 767                     |
| Disposed ash (kg/kWh) <sup>11</sup>                          | 0.29                                                   | 0.48                   | 0.31                    |
| Heat waste (MJ/kWh) <sup>12</sup>                            | 4.05                                                   | 6.78                   | 4.27                    |
| Transport (sea miles) <sup>13</sup>                          | -                                                      | -                      | 7058                    |

<sup>1</sup> The calorific value of approximately 70% of Turkish lignite reserves is below this value [1]; <sup>2</sup> Calorific value of hard coal fired in Çatalağzı TPP is 2700–3500 kcal/kg [2]; <sup>3</sup> Calorific value of imported coal fired in Su gözü TPP is 6150 kcal/kg is obtained from [3]; <sup>4</sup> Based on [4]; <sup>5</sup> In 2012, a total of 6,407,505,000 m<sup>3</sup> water was used by thermal plants with 98% of this amount supplied from the sea. Ninety-nine percent of this amount was used for cooling purposes [5]; <sup>6</sup> Chlorinated raw water drawn from rivers in order to prevent the formation of algae on machines. Then, hydrated lime and iron (III) chloride was used as feed water, softened with a demineralization process. The treatment efficiencies of these units are 95%; <sup>7</sup> In 2012 year, 16,941,013 m<sup>3</sup> of wastewater was treated by thermal plants [6]; <sup>8</sup> Wastewater discharge limits for thermal power plants were given by the Water Pollution Control Regulation [7] as COD 30 mg/L, SSM 100 mg/L, Oil and Grease 10 mg/L, Total Cyanide 0.5 mg/L, at a temperature of 35 °C; <sup>9</sup> Stack gas emissions of lignite and hard coal burned TPPs were obtained from Kincay and Ozturk [8]. Emissions generated from hard coal burning TPPs were also used for imported coal burning TPPs, since there is a lack of data; <sup>10</sup> Calculated from the average CO<sub>2</sub> emission factors given by [9]; <sup>11</sup> In 2012 year, 19,262,185 tons of ash were generated from thermal plants. A total of 67.4% of this amount was disposed of at thermal power plants. In this study, only these disposed ash amounts are considered [6]; <sup>12</sup> Heat waste to the sea was calculated using a heat equation as follows:  $Q = m \cdot c \cdot (T_{outlet} - T_{inlet})$ , where Q is the heat quantity generated by cooling, m is the amount of sea water used by thermal power plants, and c is the specific heat capacity for water (4.18 J·g<sup>-1</sup>·°C<sup>-1</sup>). It was assumed that the inlet temperature of the sea water was 15 °C, and that of the outlet sea water was 25 °C; <sup>13</sup> Transportation of the fuel was not considered for the lignite and hard coal-fired TPPs, since it was assumed that these TPPs are adjacent to the mine. The imported coal was mainly supplied from Russia, Colombia, the USA, and South Africa, with shares of 33.3%, 24.5%, 14.6%, and 11.2%, respectively [4]. Coal is shipped in by ocean freighter. It was assumed that the imported coal-fired TPPs in Zonguldak and Çanakkale were supplied fuel from Russia, since they are close to the Black Sea, whereas the TPP in Iskenderun imported coal from Colombia, since Iskenderun is close to the Mediterranean Sea. The ships' freight capacities were calculated as kg·km based on the distances [10] and coal consumption by the TPPs in direct proportion to their electricity generation.

**Table S2.** The data used to model the natural gas fired TPPs in SimaPro.

| Data Description                                        | Data                                                                        |
|---------------------------------------------------------|-----------------------------------------------------------------------------|
| Total natural gas consumption in 2012 (m <sup>3</sup> ) | 4,427,602,000 <sup>1</sup>                                                  |
| Energy obtained from natural gas (kJ/m <sup>3</sup> )   | 34,585.67 <sup>2</sup>                                                      |
| System in natural gas thermal power plants              | Combined cycle <sup>3</sup>                                                 |
| Cooling system                                          | Air dried in turbine generator, cooling water from well for steam generator |
| Water consumption (m <sup>3</sup> /year)                | 120,000 <sup>4</sup>                                                        |
| Wastewater generation (m <sup>3</sup> /year)            | 93,360 <sup>4</sup>                                                         |
| Wastewater parameters (mg/kWh) <sup>5</sup>             |                                                                             |
| COD                                                     | 216                                                                         |
| Chloride (Cl <sup>-</sup> )                             | 2160                                                                        |
| Sulphate (SO <sub>4</sub> <sup>-2</sup> )               | 3240                                                                        |
| Iron (Fe)                                               | 10.8                                                                        |
| Power plant construction                                | ecoinvent                                                                   |
| Air emissions (kg/MWh) <sup>6</sup>                     |                                                                             |
| SO <sub>2</sub>                                         | 0.043                                                                       |
| NO <sub>x</sub>                                         | 3.08                                                                        |
| CO <sub>2</sub>                                         | 456.96                                                                      |
| CO                                                      | 0.16                                                                        |

<sup>1</sup> Based on [1]; <sup>2</sup> Based on [8]; <sup>3</sup> A large amount of electricity is generated by combined cycle plants;

<sup>4</sup> Based on [11]; <sup>5</sup> The wastewater emissions of the natural gas fired TPPs were calculated using the wastewater generation amount and wastewater discharge limits given by the Turkish Regulation on Water Pollution Control (Table 9.6: 10 mg/L oil and grease and 100 mg/L SSM) [7]; <sup>6</sup> Based on [8], and [12].

**Table S3.** Hydroelectric power plants operated in 2012.

| Reservoir Basis | Installed Capacity (MW) | Electricity Generation (GWh) | River Basis | Installed Capacity (MW) | Electricity Generation (GWh) |
|-----------------|-------------------------|------------------------------|-------------|-------------------------|------------------------------|
| Almus           | 27                      | 99                           | Ceyhan      | 3.6                     | 12                           |
| Altunkaya       | 700                     | 1632                         | Çağçağ      | 14.4                    | 42                           |
| Aslantaş        | 138                     | 569                          | Defne       | 3                       | 15                           |
| Atatürk         | 2400                    | 8900                         | Doğankent-1 | 32.8                    | 124                          |
| Berke           | 510                     | 1668                         | Durucasu    | 0.8                     | 3                            |
| Birecik         | 672                     | 2518                         | Engil       | 4.6                     | 14                           |
| Borçka          | 300                     | 1039                         | Girlevik    | 3.04                    | 17                           |
| Demirköprü      | 69                      | 193                          | Hazar-1     | 20.12                   | 128                          |
| Derbent         | 58                      | 257                          | Hazar-2     | 10                      | 64                           |
| Dicle           | 110                     | 298                          | İkizdere    | 15.12                   | 100                          |
| Gökçekaya       | 278                     | 562                          | Kadıncık-1  | 70                      | 345                          |
| Hasan Uğurlu    | 500                     | 1217                         | Kayaköy     | 3.84                    | 12                           |
| Hirfanlı        | 128                     | 400                          | Kepez-1     | 26.4                    | 169                          |
| Karakaya        | 1800                    | 7534                         | Kernek      | 0.83                    | 3                            |
| Karkamış        | 189                     | 652                          | Kiti        | 2.76                    | 6                            |
| Keban           | 1130                    | 6000                         | Kovada-1    | 8.25                    | 35                           |
| Kemer           | 48                      | 143                          | Kovada-2    | 51.2                    | 222                          |
| Kesikköprü      | 76                      | 250                          | Sızır       | 6.77                    | 35                           |
| Kiğı            | 140                     | 423                          | Tortum-1    | 26.18                   | 85                           |
| Kralkızı        | 94                      | 146                          | Yerköprü    | 10.56                   | 65                           |
| Muratlı         | 115                     | 444                          |             |                         |                              |
| Oymapınar       | 540                     | 1620                         |             |                         |                              |
| Sarıyar         | 160                     | 400                          |             |                         |                              |
| Seyhan          | 54                      | 350                          |             |                         |                              |
| Sır             | 284                     | 725                          |             |                         |                              |
| Suat Uğurlu     | 46                      | 273                          |             |                         |                              |
| Yamula          | 100                     | 422                          |             |                         |                              |
| Total           | 10,666                  | 38,734                       | Total       | 314.27                  | 1496                         |

## References

1. Elektrik Üretim A.Ş. EUAS, Turkish Electricity Generation Company—Annual Report. 2012. Available online: [http://www.euas.gov.tr/Documents/YILLIK\\_RAPOR\\_2012.pdf](http://www.euas.gov.tr/Documents/YILLIK_RAPOR_2012.pdf) (accessed on 17 October 2016).
2. Kızıl, H.; Tekin, E.; Erdoğan, B.; Topal, H.İ.; Topuz, A. The experimental analysis of cool drying in fluidized bed (in Turkish). In Proceedings of the 19th National Heat Science and Technique Congress, Samsun, Turkey, 9–12 September 2013; pp. 582–587.
3. Say, N.P. Lignite-fired thermal power plants and SO<sub>2</sub> pollution in Turkey. *Energy Policy* **2006**, *34*, 2690–2701.
4. Turkish Coal Enterprise. Coal Sectoral Report. 2012. Available online: <http://www.Tki.Gov.Tr/dosyalar/dosya/k%c3%b6m%c3%bcrsekt%c3%b6rraporu2012.Pdf> (accessed on 17 October 2016). (In Turkish)
5. Turkish Statistical Institute. 2014. Available online: <http://www.tuik.gov.tr/PreHaberBultenleri.do?sessionId=p2D5TdKcR6nlNn3KY2syfqhy67mGWhFL2DTcVPGJLQG1CgtLk83!-184462139?id=16164> (accessed on 17 October 2016)
6. Turkish Statistical Institute. 2012. Available online: <http://www.turkstat.gov.tr/PreHaberBultenleri.do?id=16164> (accessed on 17 October 2016).
7. Regulation on Water Pollution Control. Official Gazette Dated 09.04.1988—No. 19.999. Available online: <http://mevzuat.basbakanlik.gov.tr/Metin.Aspx?MevzuatKod=7.5.7221&sourceXmlSearch=&MevzuatIliski=0> (accessed on 17 October 2016). (In Turkish)
8. Kincay, O.; Öztürk, R. Thermal power plants in Turkey. *Energy Sources* **2003**, *25*, 135–153.
9. IPCC Guidelines for National Greenhouse Gas Inventories. Combustion. Available online: [http://www.ipccngip.iges.or.jp/public/2006gl/pdf/2\\_Volume2/V2\\_2\\_Ch2\\_Stationary\\_Combustion.pdf](http://www.ipccngip.iges.or.jp/public/2006gl/pdf/2_Volume2/V2_2_Ch2_Stationary_Combustion.pdf) (accessed on 17 October 2016).
10. National Geospatial (2001) Distances between Ports. Available online: [http://msi.nga.mil/NGAPortal/MSI.portal?\\_nfpb=true&\\_pageLabel=msi\\_portal\\_page\\_62&pubCode=0005](http://msi.nga.mil/NGAPortal/MSI.portal?_nfpb=true&_pageLabel=msi_portal_page_62&pubCode=0005) (accessed on 17 October 2016).
11. Envy Energy. The Environmental Assessment Report of Hamitabat Natural Gas Combined Cycle Power Plant Renewal Project. Available online: [http://www.csb.gov.tr/db/ced/editordosya/Limak\\_Hamitabat\\_CED.pdf](http://www.csb.gov.tr/db/ced/editordosya/Limak_Hamitabat_CED.pdf) (accessed on 17 October 2016). (In Turkish)
12. Sözen, A.; Alp, İ.; Özdemir, A. Assessment of operational and environmental performance of the thermal power plants in Turkey by using data envelopment analysis. *Energy Policy* **2010**, *38*, 6194–6203.
